# Supplementary material for: A new cofacial binucleating macropolycycle: segregated versus encapsulated complexationElectronic supplementary information (ESI) available: spectroscopic and crystallographic data. See http://www.rsc.org/suppdata/cc/b1/b108549m/
Source: Royal Society of Chemistry journal article supplement (doi:10.1039/b108549m), 2001-11-14
Supplement: b108549m.doc [file b108549m.doc]

Spectroscopic data: H2L: 1H NMR: ** (CDCl3, 298 K, 300 MHz) 2.30 (ArC*H3*, 6 H, s) 2.55–2.72 (NC*H2*, 32 H, m), 3.47 (C*H2*N=C, 8 H, m), 7.36 (Ar*H*, 4 H, s), 8.36 (N=C*H*, 4 H, s) ppm. 13C NMR: ** 20.36, 47.18, 51.99, 53.95, 57.40, 58.40, 118.44, 125.40, 126.98, 130.75, 131.72, 157.09 and 165.59 ppm.FAB mass spectrum (3-NOBA matrix) *m/z*, found: 709, 687 for [*M* + Na+] and [*M*], respectively. IR (KBr disk), cm–1: 2925s, 2852s, 1637s and 1600s (C=N), 1458s, 1384s, 1260m, 1101m, 1033m and 804m. Elemental analysis: found (calc. for C38H58N10O2): C, 66.15 (66.44); H, 8.39 (8.51); N, 20.24% (20.39 %).

Elemental analysis: found (calc for [Cd2(L)](NO3)2·2MeOH): C, 43.76 (43.58); H, 5.83 (5.63); N, 15.31% (15.11%).

Elemental analysis: found (calc for [Y2(L)(OH)][Y(NO3)4(MeOH)2](NO3)2·2MeOH) C, 34.34 (34.25); H 4.97 (4.70); N, 15.26% (14.98%)

*Crystal data* for [Cd2(L)](NO3)2·2MeOH (4), C40H64Cd2N12O10, *M* = 1097.83, *a* = 29.371(2), *b* = 10.3258(8), *c* = 14.6576(11) Å,  = 96.188(1)°, *U* = 4419.5(6) Å3, *T* = 150(2) K, space group *C*2/c, *Z* = 4, (Mo-*K*) = 1.034 mm–1. 13837 reflections measured, 5394 unique [*R*int = 0.0451] which were used in all calculations. The final *R*1 [3569 *F* > 4(F)] was 0.0342 and *wR*2 (all data) was 0.0814.

*Crystal data* for [Y2(L)(OH)][Y(NO3)4(MeOH)2](NO3)2·2MeOH (5), C42H73N16O25Y3, *M* = 1468.89, *a* = 21.414(5), *b* = 17.830(3), *c* = 18.622(3) Å,  = 123.285(3)°, *U* = 5944(2) Å3, *T* = 150(2) K, space group *C*2/c, *Z* = 4, (Mo-*K*) = 2.998 mm–1. 16196 reflections measured, 6981 unique [*R*int = 0.074] which were used in all calculations. The final *R*1 [3733 *F* > 4(F)] was 0.0983 and *wR*2 (all data) was 0.2476.
